# Supplementary material
Source: PubMed Central journal article supplement (PMC6709636)
Supplement: supp_RA119.008630_144544_2_supp_355762_pd0dd5.pdf [file supp_RA119.008630_144544_2_supp_355762_pd0dd5.pdf]

**Supporting information 1. Cell morphology of 3T3-L1 cells and eMSCs with or without *Bcl2l13* knockdown after adipogenic differentiation.** (A) 3T3-L1 cells, cultured in adipogenic medium for 6 days. Bar: 2 $\mu$ m. (B) eMSCs, cultured in adipogenic medium for 6 days. Bar: 5 $\mu$ m.

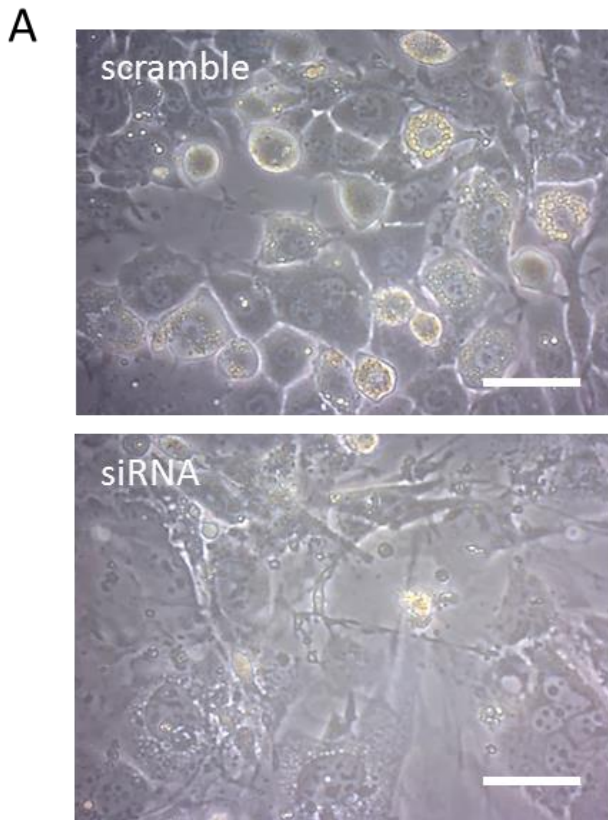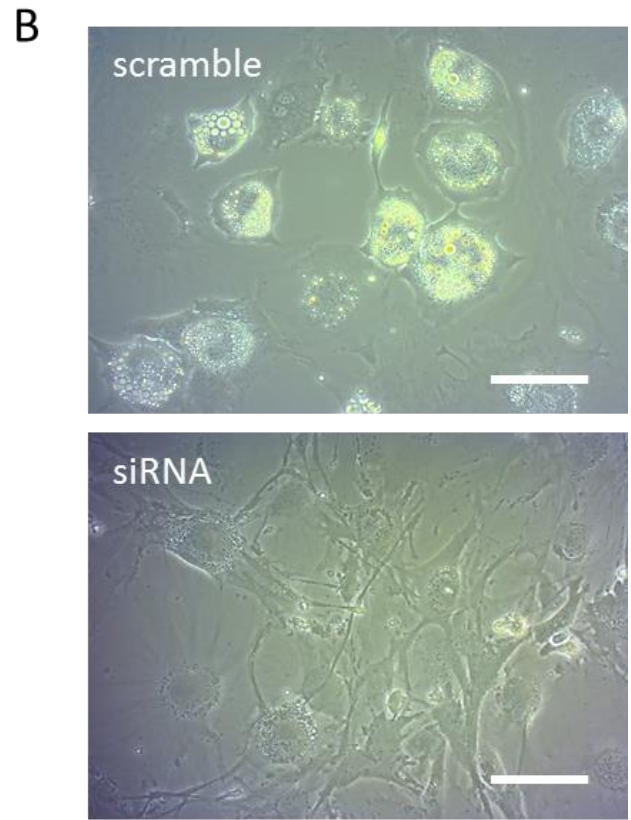

**Supporting information 2.** Adipogenic gene expression and mitochondrial DNA amount in eMSCs with *Bcl2l13* knockdown. eMSCs with transduction of scramble siRNA (Scr) or *Bcl2l13* siRNA were cultured in non-differentiation (NonD) or adipogenic (Adipo) medium for 6 days. (A) Relative mRNA levels of *Pparg* and *Adipoq*. The value for scramble on day 0 was set as 1. N = 3. (B) Mitochondrial/nuclear DNA ratio (Mt/N) shown by the rate of mitochondrial DNA (Mito) and  $\beta$ 2-microglobulin (B2M). N = 3. \* p < 0.05, \*\* p < 0.01, \*\*\* p < 0.001.

**A**

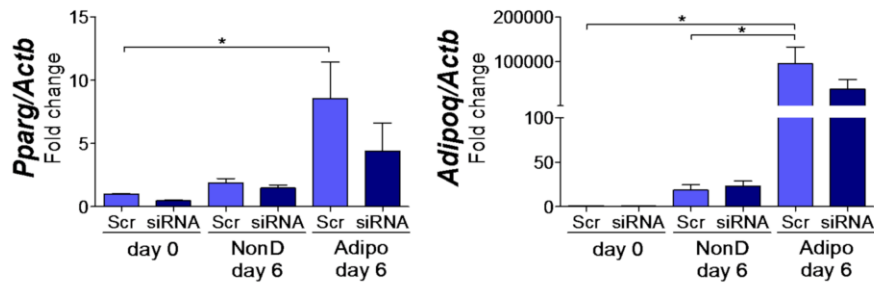

**B**

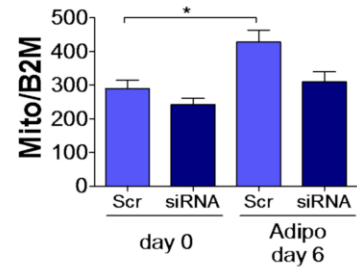

**Supporting information 3.** Digital images of confocal microscope were processed by Image J software to calculate mitophagy/mitochondria ratio. R = Red, G = Green, and B = Blue channels. Each image was split to three color channels, subtracted blue from red (R-B, all mitochondria) or blue and green from red (R-B-G, mitophagy punctae). Finally, the threshold of red color was set. Bar: 23 $\mu$ m.

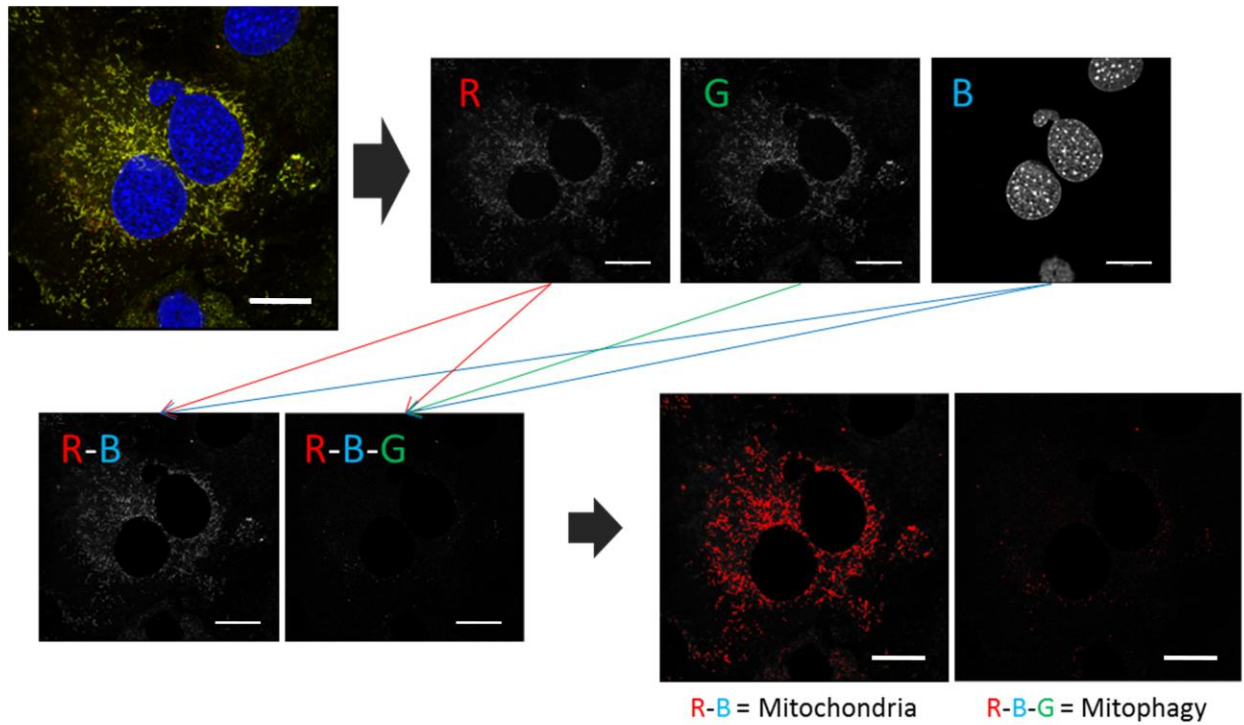

**Supporting information 4.** ROS production in *Bcl2/113* knockdown 3T3-L1 cells. 3T3-L1 cells with transduction of scramble siRNA (Scr) or *Bcl2/113* siRNA were cultured in non-differentiation (NonD) or adipogenic (Adipo) medium for 6 days. (A) Flow cytometry analysis. X and Y-axis represents APC-A (CellRox positive = ROS productive cells) and VioGreen-A (SYTOX positive = dead cells), respectively. (B) Relative living ROS positive cells rate. The value for scramble on day 0 was set as 1. N = 3. \*\* p < 0.01.

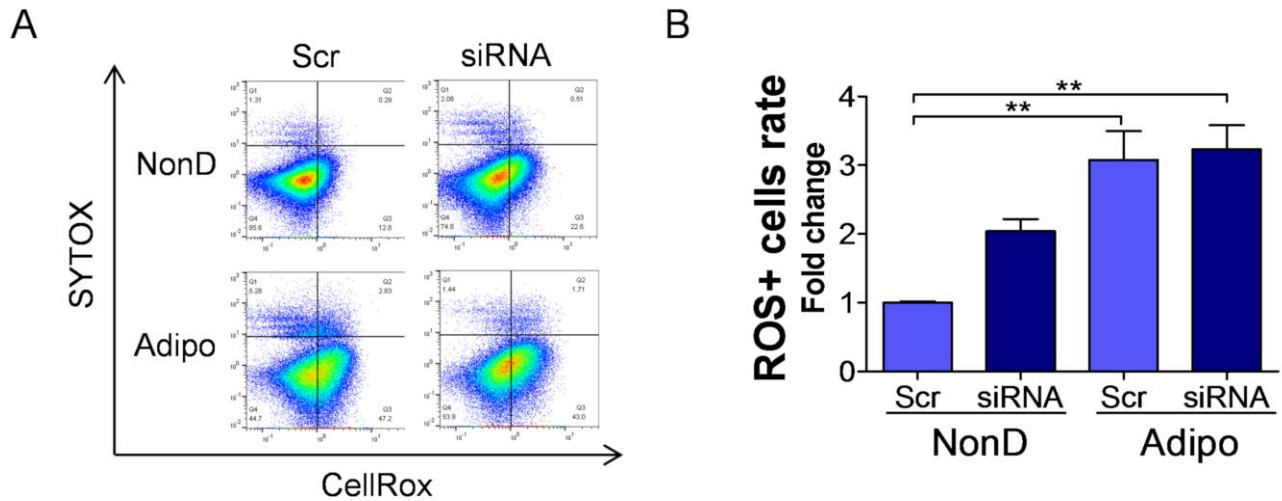

**Supporting information 5. Primer list for real-time PCR**

| Fragment       | Forward primer        | Reverse primer        | Product size (bp) |
|----------------|-----------------------|-----------------------|-------------------|
| <i>Bcl2l13</i> | agtggagactgcagtccatg  | cgtgctcctccaggtacatc  | 149               |
| <i>Bnip3</i>   | tcttggtagaactgcacttc  | gctgggcatccaacagtattt | 103               |
| <i>Bnip3l</i>  | atgtctcacttagtcgagccg | ctcatgctgtgcatccagga  | 240               |
| <i>Pink1</i>   | ttctccgccagtcggtag    | ctgcttctcctcgatcagcc  | 141               |
| <i>Prkn2</i>   | tcttccagtgaaccaccgtc  | ggcagggagtagccaagtt   | 115               |

**Supporting information 6.** Primer list for Mitochondria DNA quantification analysis

| Fragment | Forward primer       | Reverse primer       | Product size (bp) |
|----------|----------------------|----------------------|-------------------|
| mMito    | ctagaaaccccgaaacaaa  | ccagctatcaccaagctcgt | 125               |
| mB2M     | atgggaagccgaacatactg | cagtctcagtgggggtgaat | 177               |

Reference: Malik, A.N., Czajka, A., and Cunningham, P. (2016) Accurate quantification of mouse mitochondrial DNA without co-amplification of nuclear mitochondrial insertion sequences. *Mitochondrion* 29, 59-64
